# Supplementary material for: Anticancer Activity of ST101, A Novel Antagonist of CCAAT/Enhancer Binding Protein β
Source: Oxford University Press journal article supplement (doi:10.1158/1535-7163.mct-21-0962), 2022-09-16
Supplement: mct-21-0962_supplemental_table_6_suppst6.xlsx [file mct-21-0962_supplemental_table_6_suppst6.xlsx]

## Sheet: Sheet1
Gene Symbol	FC	adj.P.Val	Log2FC	log10_adj.P.Val
CTNNAL1	-2.04	4.84e-11	-0.30963	10.3152
MCMBP	-1.442	6.73e-09	-0.158965	8.17198
H2AZ1	-1.72	1.51e-08	-0.235528	7.82102
MAP4K4	1.367	1.97e-08	0.135769	7.70553
ITPR3	1.625	4.06e-08	0.210853	7.39147
SERPINE1	4.609	6.68e-08	0.663607	7.17522
GSR	-1.378	6.81e-08	-0.139249	7.16685
HNRNPR	-1.352	6.82e-08	-0.130977	7.16622
CITED4	1.995	7.77e-08	0.299943	7.10958
B4GALT1	1.469	1.08e-07	0.167022	6.96658
CHEK2	-1.675	1.52e-07	-0.224015	6.81816
ERLIN1	-1.414	1.62e-07	-0.150449	6.79048
RPA3	-1.684	3.35e-07	-0.226342	6.47496
ACLY	1.319	7.85e-07	0.120245	6.10513
NFIL3	-1.526	8.7e-07	-0.183555	6.06048
RUVBL2	-1.443	9.02e-07	-0.159266	6.04479
PANK3	1.335	9.02e-07	0.125481	6.04479
TUBA1A	1.736	1.17e-06	0.23955	5.93181
CTDSPL2	-1.382	1.19e-06	-0.140508	5.92445
ZFP36L1	1.943	1.34e-06	0.288473	5.8729
TUBB6	-1.345	1.6e-06	-0.128722	5.79588
TSPAN5	1.679	1.79e-06	0.225051	5.74715
PDAP1	-1.281	2.41e-06	-0.107549	5.61798
SFXN4	-1.396	3.87e-06	-0.144885	5.41229
NAT9	1.446	4.28e-06	0.160168	5.36856
PIP5K1A	-1.217	4.79e-06	-0.0852906	5.31966
CNOT1	-1.232	8.15e-06	-0.0906107	5.08884
RAD23B	-1.244	1.09e-05	-0.0948204	4.96257
SEPHS2	-1.255	1.17e-05	-0.0986437	4.93181
SLC39A13	1.305	1.23e-05	0.115611	4.91009
TOB1	-1.327	1.34e-05	-0.122871	4.8729
TMEM104	1.338	1.42e-05	0.126456	4.84771
ANKRD11	1.25	1.95e-05	0.09691	4.70997
CHD2	1.27	2.07e-05	0.103804	4.68403
TBL1X	-1.372	2.86e-05	-0.137354	4.54363
NEK6	-1.271	3.07e-05	-0.104146	4.51286
SRPK1	-1.218	4.05e-05	-0.0856473	4.39254
GARS1	-1.213	5.59e-05	-0.0838608	4.25259
ITGA5	1.613	6.07e-05	0.207634	4.21681
NSD3	-1.204	6.09e-05	-0.0806265	4.21538
CLIP1	-1.256	6.14e-05	-0.0989896	4.21183
VPS13C	1.385	6.17e-05	0.14145	4.20971
SMIM29	1.461	6.47e-05	0.16465	4.1891
LMO4	-1.421	7.29e-05	-0.152594	4.13727
PRDX3	-1.283	7.32e-05	-0.108227	4.13549
LEMD2	1.176	0.000115	0.0704073	3.9393
NFE2L2	-1.275	0.000175	-0.10551	3.75696
ZNF217	-1.177	0.000175	-0.0707765	3.75696
WDR81	1.313	0.000192	0.118265	3.7167
GYS1	-1.202	0.0002	-0.0799045	3.69897
FRMD5	2.127	0.00022	0.327767	3.65758
CDKN1B	-1.246	0.000246	-0.095518	3.60906
PRDX4	-1.281	0.000273	-0.107549	3.56384
CSNK1E	1.205	0.0004	0.080987	3.39794
MTF2	-1.346	0.000407	-0.129045	3.39041
FLOT2	-1.205	0.000421	-0.080987	3.37572
VIT	2.925	0.00043	0.466126	3.36653
NFKBIA	-1.262	0.000473	-0.101059	3.32514
EP300	1.16	0.000482	0.064458	3.31695
ECHDC2	1.423	0.000493	0.153205	3.30715
SOCS2	1.488	0.000505	0.172603	3.29671
SPRY4	1.587	0.000511	0.200577	3.29158
CACNB1	2.368	0.00059	0.374382	3.22915
LRFN4	1.278	0.000605	0.106531	3.21824
NFKBIE	1.276	0.000635	0.105851	3.19723
TFDP2	-1.178	0.000682	-0.0711453	3.16622
CRIM1	-1.256	0.000706	-0.0989896	3.1512
STC2	-1.37	0.000886	-0.136721	3.05257
ARRDC3	1.42	0.000901	0.152288	3.04528
CUEDC1	1.313	0.000983	0.118265	3.00745
IP6K2	1.259	0.00104	0.100026	2.98297
SMC6	-1.161	0.0011	-0.0648322	2.95861
EDN2	-5.794	0.00114	-0.762978	2.9431
LUZP1	1.218	0.00123	0.0856473	2.91009
SYNCRIP	-1.122	0.00133	-0.0499929	2.87615
CSDE1	-1.13	0.00153	-0.0530784	2.81531
C2CD2	1.265	0.00158	0.102091	2.80134
ERF	-1.148	0.0016	-0.0599419	2.79588
TXLNG	-1.258	0.00164	-0.0996806	2.78516
GDPD5	1.377	0.00195	0.138934	2.70997
MAPK14	-1.135	0.00206	-0.0549959	2.68613
SIK3	-1.241	0.00256	-0.0937718	2.59176
PLCB1	-1.355	0.0026	-0.131939	2.58503
ETF1	-1.149	0.00276	-0.06032	2.55909
ACSL5	-1.905	0.00282	-0.279895	2.54975
GPATCH11	-1.322	0.00292	-0.121231	2.53462
NDRG1	-1.356	0.00303	-0.13226	2.51856
MOSPD2	1.202	0.00341	0.0799045	2.46725
HECTD4	1.236	0.00372	0.0920185	2.42946
THRA	-1.228	0.00384	-0.0891984	2.41567
CFL2	-1.208	0.00386	-0.0820669	2.41341
FAM217B	-1.17	0.00462	-0.0681859	2.33536
ELMO3	1.379	0.00464	0.139564	2.33348
KLF5	-1.212	0.00468	-0.0835026	2.32975
SHKBP1	1.123	0.0049	0.0503798	2.3098
MYO1C	-1.125	0.00505	-0.0511525	2.29671
FOXP1	1.404	0.00603	0.147367	2.21968
MBNL1	-1.156	0.00642	-0.0629578	2.19246
CEP120	-1.16	0.00661	-0.064458	2.1798
USP9X	-1.157	0.00665	-0.0633334	2.17718
DDX47	2.197	0.00759	0.34183	2.11976
SLC25A12	-1.188	0.00773	-0.0748164	2.11182
AAR2	-1.176	0.00804	-0.0704073	2.09474
ASGR1	-2.841	0.00855	-0.453471	2.06803
TCF12	-1.121	0.00893	-0.0496056	2.04915
IDH1	1.16	0.00961	0.064458	2.01728
ETV6	1.164	0.0102	0.065953	1.9914
S100A9	4.465	0.0104	0.649821	1.98297
PDGFB	3.775	0.011	0.576917	1.95861
TGIF1	1.106	0.0116	0.0437551	1.93554
DOCK3	1.6	0.0121	0.20412	1.91721
UBQLN1	-1.112	0.0125	-0.0461048	1.90309
ARF6	-1.115	0.0132	-0.0472749	1.87943
DUSP1	-1.284	0.0133	-0.108565	1.87615
FIGN	-1.344	0.0139	-0.128399	1.85699
MBIP	-1.198	0.0151	-0.0784568	1.82102
DCAF6	-1.134	0.0159	-0.0546131	1.7986
BUD31	-1.187	0.0162	-0.0744507	1.79048
ACAA2	-1.226	0.0169	-0.0884905	1.77211
PITX2	2.053	0.0179	0.312389	1.74715
CASS4	-2.744	0.0181	-0.438384	1.74232
GOT1	-1.179	0.0194	-0.0715138	1.7122
WNT6	-3.847	0.0213	-0.585122	1.67162
CEBPB	1.12	0.023	0.049218	1.63827
NHLH1	2.599	0.0232	0.414806	1.63451
PHF21A	1.118	0.024	0.0484418	1.61979
NOL4L	1.159	0.0259	0.0640834	1.5867
SPTLC2	-1.091	0.027	-0.0378248	1.56864
LRP1	1.498	0.0275	0.175512	1.56067
MED12L	-1.717	0.0281	-0.23477	1.55129
ESR1	3.695	0.03	0.567614	1.52288
SLC7A11	1.305	0.0309	0.115611	1.51004
BNIP3L	-1.138	0.0314	-0.0561423	1.50307
RIN3	1.165	0.0327	0.0663259	1.48545
H2AJ	-1.387	0.0332	-0.142076	1.47886
METTL9	-1.092	0.0339	-0.0382226	1.4698
BCL6	-1.233	0.0382	-0.0909631	1.41794
BAZ1A	1.081	0.0397	0.0338257	1.40121
MRC2	1.093	0.0413	0.0386202	1.38405
MSH5	1.568	0.0431	0.195346	1.36552
RPS21	-1.26	0.0437	-0.100371	1.35952
MYRFL	4.234	0.0441	0.626751	1.35556
PRR15	-1.365	0.046	-0.135133	1.33724
GLIPR2	1.205	0.0477	0.080987	1.32148
KDM4A	1.148	0.0488	0.0599419	1.31158
RRBP1	1.111	0.049	0.0457141	1.3098
TRIB1	1.124	0.0495	0.0507663	1.30539
EIF4A1	1.557	0.0508	0.192289	1.29414
IGFBP5	-3.134	0.0544	-0.496099	1.2644
IRF5	1.166	0.0551	0.0666986	1.25885
FAM53C	-1.093	0.0568	-0.0386202	1.24565
BCL11A	2.486	0.0588	0.395501	1.23062
LARP7	-1.129	0.0602	-0.0526939	1.2204
RCAN1	-1.12	0.0647	-0.049218	1.1891
WNT10B	-1.37	0.0669	-0.136721	1.17457
C1orf122	-1.103	0.0678	-0.0425755	1.16877
CCNL1	1.269	0.0695	0.103462	1.15802
PPM1B	-1.19	0.0698	-0.075547	1.15614
MARVELD1	1.112	0.0712	0.0461048	1.14752
TOP1	-1.077	0.073	-0.0322157	1.13668
SPAG9	1.072	0.0785	0.0301948	1.10513
SLC25A35	1.255	0.0803	0.0986437	1.09528
MAP3K3	1.092	0.0812	0.0382226	1.09044
ITGA11	2.273	0.0855	0.356599	1.06803
NLRP3	3.281	0.0953	0.516006	1.02091
SULF1	2.573	0.101	0.41044	0.995679
FGB	-2.039	0.103	-0.309417	0.987163
NFATC4	2.424	0.103	0.384533	0.987163
UGP2	-1.083	0.107	-0.0346285	0.970616
P2RY1	-1.251	0.11	-0.0972573	0.958607
POLG	1.083	0.114	0.0346285	0.943095
SPRED1	1.151	0.114	0.0610753	0.943095
CIPC	-1.093	0.123	-0.0386202	0.910095
SERTAD4	1.283	0.123	0.108227	0.910095
GEN1	-1.126	0.127	-0.0515384	0.896196
S100PBP	-1.09	0.127	-0.0374265	0.896196
SMARCAD1	-1.114	0.129	-0.0468852	0.88941
FGA	-1.9	0.131	-0.278754	0.882729
TMPRSS4	2.053	0.133	0.312389	0.876148
KPNA3	-1.075	0.142	-0.0314085	0.847712
MIDEAS	1.069	0.146	0.0289777	0.835647
ALDOA	1.237	0.146	0.0923697	0.835647
TPM2	-1.14	0.149	-0.0569049	0.826814
H3-3B	1.062	0.149	0.0261245	0.826814
ERRFI1	-1.311	0.151	-0.117603	0.821023
JADE3	-1.103	0.151	-0.0425755	0.821023
SARS1	-1.08	0.16	-0.0334238	0.79588
FSIP2	2.567	0.16	0.409426	0.79588
EHF	-2.008	0.162	-0.302764	0.790485
LYPD1	-1.934	0.166	-0.286456	0.779892
SOBP	-1.276	0.166	-0.105851	0.779892
ID3	-1.918	0.178	-0.282849	0.74958
JADE2	-1.07	0.182	-0.0293838	0.739929
CLN5	1.206	0.182	0.0813473	0.739929
EIF4A2	-1.088	0.191	-0.0366289	0.718967
CKAP4	-1.079	0.194	-0.0330214	0.712198
TNFSF14	1.522	0.195	0.182415	0.709965
FOXN3	1.072	0.201	0.0301948	0.696804
CASK	-1.072	0.204	-0.0301948	0.69037
DDIT3	1.243	0.206	0.0944711	0.686133
CBX4	-1.087	0.211	-0.0362295	0.675718
STK39	-1.076	0.212	-0.0318123	0.673664
PTPN12	1.062	0.215	0.0261245	0.667562
RAB44	3.194	0.219	0.504335	0.659556
ZEB2	1.52	0.221	0.181844	0.655608
AP1S2	1.101	0.224	0.0417873	0.649752
RBPMS	-1.18	0.225	-0.071882	0.647817
PRR14L	-1.066	0.229	-0.0277572	0.640165
CACNB2	1.497	0.237	0.175222	0.625252
PBDC1	-1.089	0.239	-0.0370279	0.621602
TBC1D10B	-1.064	0.243	-0.0269416	0.614394
STAT3	1.047	0.25	0.0199467	0.60206
ZIC1	-1.835	0.252	-0.263636	0.598599
RGS3	-1.185	0.256	-0.0737184	0.59176
EFNA5	1.231	0.26	0.0902581	0.585027
HOXC13	-1.182	0.263	-0.0726175	0.580044
RAB3IP	-1.074	0.264	-0.0310043	0.578396
GYG1	-1.079	0.265	-0.0330214	0.576754
LONRF3	1.506	0.271	0.177825	0.567031
APC	1.087	0.273	0.0362295	0.563837
ARID1B	-1.058	0.275	-0.0244857	0.560667
PCDH7	-1.681	0.276	-0.225568	0.559091
NRP2	1.893	0.278	0.277151	0.555955
CEP41	-1.066	0.28	-0.0277572	0.552842
DMD	-1.913	0.283	-0.281715	0.548214
DDR2	1.628	0.286	0.211654	0.543634
S100A8	-1.339	0.303	-0.126781	0.518557
MITF	-1.267	0.311	-0.102777	0.50724
STC1	1.616	0.328	0.208441	0.484126
MIR22HG	1.205	0.331	0.080987	0.480172
TRMT10A	-1.129	0.334	-0.0526939	0.476254
SFTPD	1.599	0.337	0.203848	0.47237
DENND2D	-1.307	0.343	-0.116276	0.464706
NDUFA4L2	1.264	0.345	0.101747	0.462181
PPL	-1.3	0.351	-0.113943	0.454693
FBXW4	-1.076	0.351	-0.0318123	0.454693
KCNJ2	-2.376	0.353	-0.375846	0.452225
SERPINF1	1.152	0.353	0.0614525	0.452225
IL1RAPL2	-1.733	0.354	-0.238799	0.450997
CDKL5	-1.13	0.354	-0.0530784	0.450997
SMAD1	-1.093	0.357	-0.0386202	0.447332
CAVIN2	-1.655	0.36	-0.218798	0.443697
RAB2A	-1.056	0.36	-0.0236639	0.443697
UBE2E2	-1.081	0.379	-0.0338257	0.421361
FLVCR2	-1.32	0.38	-0.120574	0.420216
RBM39	-1.031	0.391	-0.0132587	0.407823
KCNE3	-1.536	0.399	-0.186391	0.399027
ARNT	1.039	0.402	0.0166155	0.395774
PLPP5	1.049	0.404	0.0207755	0.393619
H1-2	-1.082	0.432	-0.0342273	0.364516
PDCL	-1.051	0.432	-0.0216027	0.364516
PRLR	1.796	0.44	0.254306	0.356547
BDKRB1	1.638	0.442	0.214314	0.354578
LCOR	1.057	0.443	0.024075	0.353596
ONECUT2	-1.326	0.447	-0.122544	0.349692
P2RY13	-1.332	0.449	-0.124504	0.347754
C1QL1	1.136	0.452	0.0553783	0.344862
ASCL2	-1.657	0.453	-0.219323	0.343902
PDGFRL	-1.517	0.453	-0.180986	0.343902
ALDH1A2	-1.838	0.46	-0.264346	0.337242
CHAC1	-1.195	0.468	-0.0773679	0.329754
IL23A	-1.316	0.47	-0.119256	0.327902
SIRPA	1.044	0.472	0.0187005	0.326058
ALB	-1.776	0.478	-0.249443	0.320572
CLDN10	1.751	0.478	0.243286	0.320572
FCER1G	1.884	0.482	0.275081	0.316953
PPP1R3D	-1.072	0.49	-0.0301948	0.309804
PRKCG	1.423	0.515	0.153205	0.288193
PLCB2	-1.582	0.516	-0.199206	0.28735
NADK	1.034	0.522	0.0145205	0.282329
SP8	-1.56	0.529	-0.193125	0.276544
DYRK3	-1.063	0.532	-0.0265333	0.274088
CPNE4	-1.207	0.545	-0.0817073	0.263603
VCAN	1.506	0.545	0.177825	0.263603
PTCH1	-1.073	0.551	-0.0305997	0.258848
SMAD6	1.065	0.556	0.0273496	0.254925
GPR85	-1.334	0.561	-0.125156	0.251037
IL1B	1.584	0.563	0.199755	0.249492
PDGFRA	1.802	0.574	0.255755	0.241088
SYNJ1	-1.051	0.577	-0.0216027	0.238824
CP	-1.358	0.578	-0.1329	0.238072
MYH3	1.132	0.586	0.0538464	0.232102
FHIT	1.166	0.587	0.0666986	0.231362
NREP	1.11	0.593	0.045323	0.226945
PIM1	-1.045	0.595	-0.0191163	0.225483
ZIC4	1.093	0.595	0.0386202	0.225483
MREG	-1.057	0.6	-0.024075	0.221849
AP1G1	-1.024	0.601	-0.0103	0.221126
GLP2R	-1.246	0.606	-0.095518	0.217527
SBF2	-1.055	0.606	-0.0232525	0.217527
STX18	-1.042	0.607	-0.0178677	0.216811
S1PR5	-1.125	0.61	-0.0511525	0.21467
ZBTB18	1.087	0.612	0.0362295	0.213249
TSHZ3	1.317	0.615	0.119586	0.211125
WNK2	-1.343	0.617	-0.128076	0.209715
FST	-1.396	0.623	-0.144885	0.205512
G0S2	-1.277	0.623	-0.106191	0.205512
TP63	1.356	0.625	0.13226	0.20412
STEAP4	1.406	0.634	0.147985	0.197911
SMARCA2	1.026	0.635	0.0111474	0.197226
WNT5A	-1.098	0.642	-0.0406023	0.192465
FBXL14	-1.05	0.644	-0.0211893	0.191114
SPRR1B	1.094	0.655	0.0390173	0.183759
BNC2	1.278	0.655	0.106531	0.183759
DLX1	-1.206	0.657	-0.0813473	0.182435
SKIDA1	-1.116	0.659	-0.0476642	0.181115
COL4A3	1.437	0.659	0.157457	0.181115
VAMP3	-1.024	0.662	-0.0103	0.179142
C3	-1.126	0.668	-0.0515384	0.175224
BAHD1	-1.037	0.668	-0.0157788	0.175224
NFKBIZ	1.334	0.668	0.125156	0.175224
ASAH2	1.186	0.671	0.0740847	0.173277
ADRB2	-1.315	0.673	-0.118926	0.171985
CYP24A1	1.224	0.673	0.0877814	0.171985
KLHL7	-1.036	0.676	-0.0153598	0.170053
HAVCR1	1.263	0.684	0.101403	0.164944
PER1	-1.058	0.688	-0.0244857	0.162412
SLC19A3	-1.507	0.69	-0.178113	0.161151
MAP2K3	-1.022	0.694	-0.0094509	0.158641
LPO	1.319	0.701	0.120245	0.154282
PCTP	1.029	0.708	0.0124154	0.149967
ANGPT1	-1.325	0.713	-0.122216	0.14691
ZFYVE9	-1.043	0.713	-0.0182843	0.14691
ATP13A4	-1.317	0.719	-0.119586	0.143271
RCOR1	1.023	0.719	0.00987563	0.143271
NCKAP5	-1.263	0.72	-0.101403	0.142668
GABRA3	-1.219	0.723	-0.0860037	0.140862
CCND2	-1.207	0.727	-0.0817073	0.138466
TNF	-1.334	0.734	-0.125156	0.134304
DLG2	1.142	0.738	0.0576661	0.131944
ZBTB20	1.148	0.738	0.0599419	0.131944
PDGFC	-1.135	0.747	-0.0549959	0.126679
ME3	-1.122	0.752	-0.0499929	0.123782
MTSS1	1.068	0.758	0.0285713	0.120331
SCYL2	1.022	0.759	0.0094509	0.119758
PPM1A	1.02	0.763	0.00860017	0.117475
FABP4	1.094	0.766	0.0390173	0.115771
PDE3B	-1.244	0.767	-0.0948204	0.115205
MCEMP1	-1.332	0.768	-0.124504	0.114639
PPARG	-1.195	0.772	-0.0773679	0.112383
TMEM255A	1.247	0.772	0.0958665	0.112383
CEPT1	-1.023	0.775	-0.00987563	0.110698
HOXA5	-1.053	0.781	-0.0224284	0.107349
GPR3	-1.062	0.787	-0.0261245	0.104025
HOXC10	-1.123	0.791	-0.0503798	0.101824
REXO2	1.028	0.793	0.0119931	0.100727
LGALS12	-1.312	0.801	-0.117934	0.0963675
FAM91A1	-1.015	0.802	-0.00646604	0.0958256
YRDC	-1.028	0.807	-0.0119931	0.0931265
ADGRG3	1.239	0.813	0.0930713	0.0899095
KRT23	-1.129	0.816	-0.0526939	0.0883098
KLHL6	-1.334	0.821	-0.125156	0.0856568
IMPDH1	1.015	0.823	0.00646604	0.0846002
CHST9	1.094	0.823	0.0390173	0.0846002
CDC42EP3	1.034	0.836	0.0145205	0.0777937
MAGED2	1.016	0.841	0.00689371	0.075204
PAX8	-1.199	0.844	-0.0788192	0.0736576
RORA	1.06	0.851	0.0253059	0.0700704
PPP1CB	1.019	0.854	0.00817418	0.0685421
SLIT3	1.2	0.854	0.0791812	0.0685421
SBSN	1.22	0.856	0.0863598	0.0675262
MTF1	-1.015	0.857	-0.00646604	0.0670192
PIK3R1	1.018	0.858	0.00774778	0.0665127
HSP90B1	-1.011	0.86	-0.00475116	0.0655015
HOXC4	-1.086	0.863	-0.0358298	0.0639892
PAFAH2	-1.019	0.863	-0.00817418	0.0639892
PCDHGC3	1.042	0.868	0.0178677	0.0614803
TSHZ2	1.094	0.87	0.0390173	0.0604807
RC3H2	-1.012	0.877	-0.00518051	0.0570004
PDE4D	1.021	0.879	0.00902574	0.0560111
ACVR2A	1.064	0.881	0.0269416	0.0550241
PCDH8	1.094	0.882	0.0390173	0.0545314
MPPED2	1.094	0.884	0.0390173	0.0535477
FGF9	1.094	0.89	0.0390173	0.05061
SMARCA1	-1.085	0.891	-0.0354297	0.0501223
PRG4	1.117	0.894	0.0480532	0.0486625
FAP	1.094	0.897	0.0390173	0.0472076
AFF3	1.094	0.897	0.0390173	0.0472076
RARB	1.127	0.897	0.0519239	0.0472076
EPHA7	-1.076	0.898	-0.0318123	0.0467237
C1S	-1.037	0.901	-0.0157788	0.0452752
SOX5	1.094	0.902	0.0390173	0.0447935
FBXW7	1.012	0.903	0.00518051	0.0443122
PCF11	-1.008	0.905	-0.00346053	0.0433514
BDNF	1.109	0.906	0.0449315	0.0428718
PHOSPHO1	1.125	0.906	0.0511525	0.0428718
SAA1	1.12	0.91	0.049218	0.0409586
MYH7	1.248	0.91	0.0962146	0.0409586
PRDM16	-1.05	0.911	-0.0211893	0.0404816
DENND4A	1.009	0.912	0.00389117	0.0400052
RHOB	1.012	0.912	0.00518051	0.0400052
ETV1	1.072	0.912	0.0301948	0.0400052
TNFSF13B	1.113	0.912	0.0464952	0.0400052
TTC39B	1.043	0.918	0.0182843	0.0371573
DYRK1A	1.005	0.919	0.00216606	0.0366845
STRN	-1.008	0.92	-0.00346053	0.0362122
TGFB3	-1.061	0.921	-0.0257154	0.0357404
PDE1B	1.107	0.921	0.0441476	0.0357404
COL4A4	1.063	0.927	0.0265333	0.0329203
RASAL2	-1.01	0.931	-0.00432137	0.0310503
EPHB6	-1.048	0.933	-0.0203613	0.0301184
STEAP2	-1.045	0.934	-0.0191163	0.0296531
FAR1	-1.006	0.936	-0.00259798	0.0287242
TFE3	-1.005	0.936	-0.00216606	0.0287242
ZADH2	1.005	0.939	0.00216606	0.0273344
HEXIM2	-1.016	0.948	-0.00689371	0.0231917
ERBB4	1.063	0.954	0.0265333	0.0204516
PLA2G4A	-1.029	0.959	-0.0124154	0.0181814
TNNC2	1.047	0.972	0.0199467	0.0123337
FOXP3	1.017	0.975	0.00732095	0.0109954
GPX1	1.008	0.98	0.00346053	0.00877392
MAP2K6	1.004	0.987	0.00173371	0.00568285
MARCKS	-1.002	0.998	-0.000867722	0.000869459
BMF	#N/A	#N/A	#N/A	#N/A
ABCA6	#N/A	#N/A	#N/A	#N/A
ACE2	#N/A	#N/A	#N/A	#N/A
ADAMTS5	#N/A	#N/A	#N/A	#N/A
ACAN	#N/A	#N/A	#N/A	#N/A
AKR1D1	#N/A	#N/A	#N/A	#N/A
ARPP21	#N/A	#N/A	#N/A	#N/A
BMX	#N/A	#N/A	#N/A	#N/A
CAPN6	#N/A	#N/A	#N/A	#N/A
CASQ1	#N/A	#N/A	#N/A	#N/A
COL25A1	#N/A	#N/A	#N/A	#N/A
DCN	#N/A	#N/A	#N/A	#N/A
DSC1	#N/A	#N/A	#N/A	#N/A
F9	#N/A	#N/A	#N/A	#N/A
FGF14	#N/A	#N/A	#N/A	#N/A
YIPF7	#N/A	#N/A	#N/A	#N/A
FOXP2	#N/A	#N/A	#N/A	#N/A
GRM7	#N/A	#N/A	#N/A	#N/A
IL10	#N/A	#N/A	#N/A	#N/A
IL19	#N/A	#N/A	#N/A	#N/A
IL1F10	#N/A	#N/A	#N/A	#N/A
ITK	#N/A	#N/A	#N/A	#N/A
KCNJ13	#N/A	#N/A	#N/A	#N/A
KLK9	#N/A	#N/A	#N/A	#N/A
KRT25	#N/A	#N/A	#N/A	#N/A
SIAH3	#N/A	#N/A	#N/A	#N/A
LRRTM3	#N/A	#N/A	#N/A	#N/A
MYBPC1	#N/A	#N/A	#N/A	#N/A
MYH4	#N/A	#N/A	#N/A	#N/A
OTOP3	#N/A	#N/A	#N/A	#N/A
PTGIR	#N/A	#N/A	#N/A	#N/A
	#N/A	#N/A	#N/A	#N/A
RGN	#N/A	#N/A	#N/A	#N/A
SLC12A1	#N/A	#N/A	#N/A	#N/A
SPIB	#N/A	#N/A	#N/A	#N/A
ST18	#N/A	#N/A	#N/A	#N/A
TAFA1	#N/A	#N/A	#N/A	#N/A
TBL1Y	#N/A	#N/A	#N/A	#N/A
TBR1	#N/A	#N/A	#N/A	#N/A
RNF17	#N/A	#N/A	#N/A	#N/A
AMTN	#N/A	#N/A	#N/A	#N/A
VNN3	#N/A	#N/A	#N/A	#N/A
AQP9	#N/A	#N/A	#N/A	#N/A
ATAD2	#N/A	#N/A	#N/A	#N/A
CCL3	#N/A	#N/A	#N/A	#N/A
CHRM1	#N/A	#N/A	#N/A	#N/A
SARNP	#N/A	#N/A	#N/A	#N/A
CITED1	#N/A	#N/A	#N/A	#N/A
CSMD3	#N/A	#N/A	#N/A	#N/A
DBH	#N/A	#N/A	#N/A	#N/A
ELAVL2	#N/A	#N/A	#N/A	#N/A
ARHGEF38	#N/A	#N/A	#N/A	#N/A
LINC00670	#N/A	#N/A	#N/A	#N/A
FMO2	#N/A	#N/A	#N/A	#N/A
IL27	#N/A	#N/A	#N/A	#N/A
KCNH7	#N/A	#N/A	#N/A	#N/A
LEP	#N/A	#N/A	#N/A	#N/A
MEOX2	#N/A	#N/A	#N/A	#N/A
MMP27	#N/A	#N/A	#N/A	#N/A
PALS2	#N/A	#N/A	#N/A	#N/A
P2RY4	#N/A	#N/A	#N/A	#N/A
PFN2	#N/A	#N/A	#N/A	#N/A
PHLDB1	#N/A	#N/A	#N/A	#N/A
PHOX2B	#N/A	#N/A	#N/A	#N/A
PKNOX2	#N/A	#N/A	#N/A	#N/A
PLA2G2E	#N/A	#N/A	#N/A	#N/A
OPN1LW	#N/A	#N/A	#N/A	#N/A
RFX4	#N/A	#N/A	#N/A	#N/A
RGR	#N/A	#N/A	#N/A	#N/A
RS1	#N/A	#N/A	#N/A	#N/A
SERPINA7	#N/A	#N/A	#N/A	#N/A
SLC6A4	#N/A	#N/A	#N/A	#N/A
SOX10	#N/A	#N/A	#N/A	#N/A
TAC1	#N/A	#N/A	#N/A	#N/A
TRPM1	#N/A	#N/A	#N/A	#N/A
STMN1	#N/A	#N/A	#N/A	#N/A
